# Supplementary material
Source: ML conference proceedings conference paper supplement (https://openaccess.thecvf.com/content/WACV2025/html/Gu_Differential_Privacy_Mechanisms_WACV_2025_paper.html)

# Private NTK Regression Accuracy

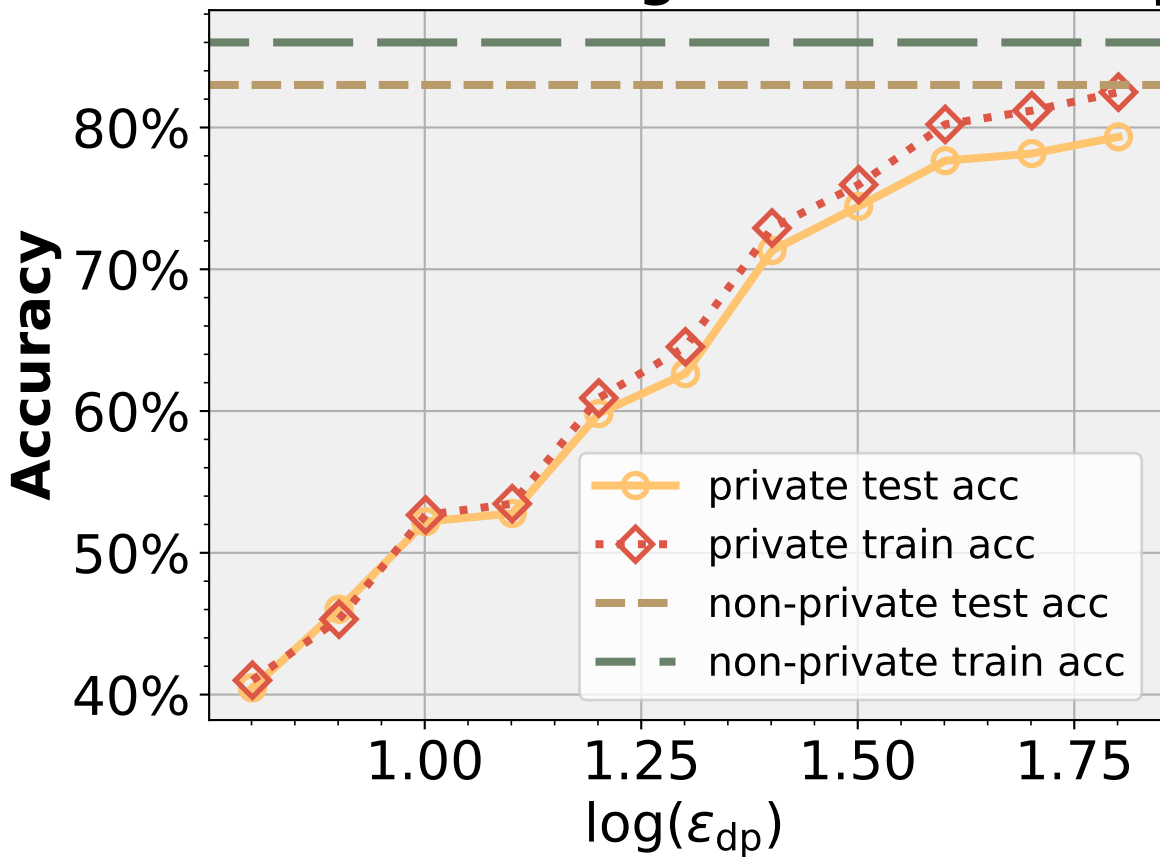

Supplement: Supplementary file 2 [file Gu_Differential_Privacy_Mechanisms_WACV_2025_supplemental.zip]
